# Supplementary material for: ZEPPI: proteome-scale sequence-based evaluation of protein-protein interaction models
Source: PubMed Central journal article supplement (PMC10543297; doi:10.21203/rs.3.rs-3289791/v1), 2023-09-18
Supplement: NIHPPRS3289791V1-supplement-1.pdf [file NIHPPRS3289791V1-supplement-1.pdf]

## Supplemental Information:

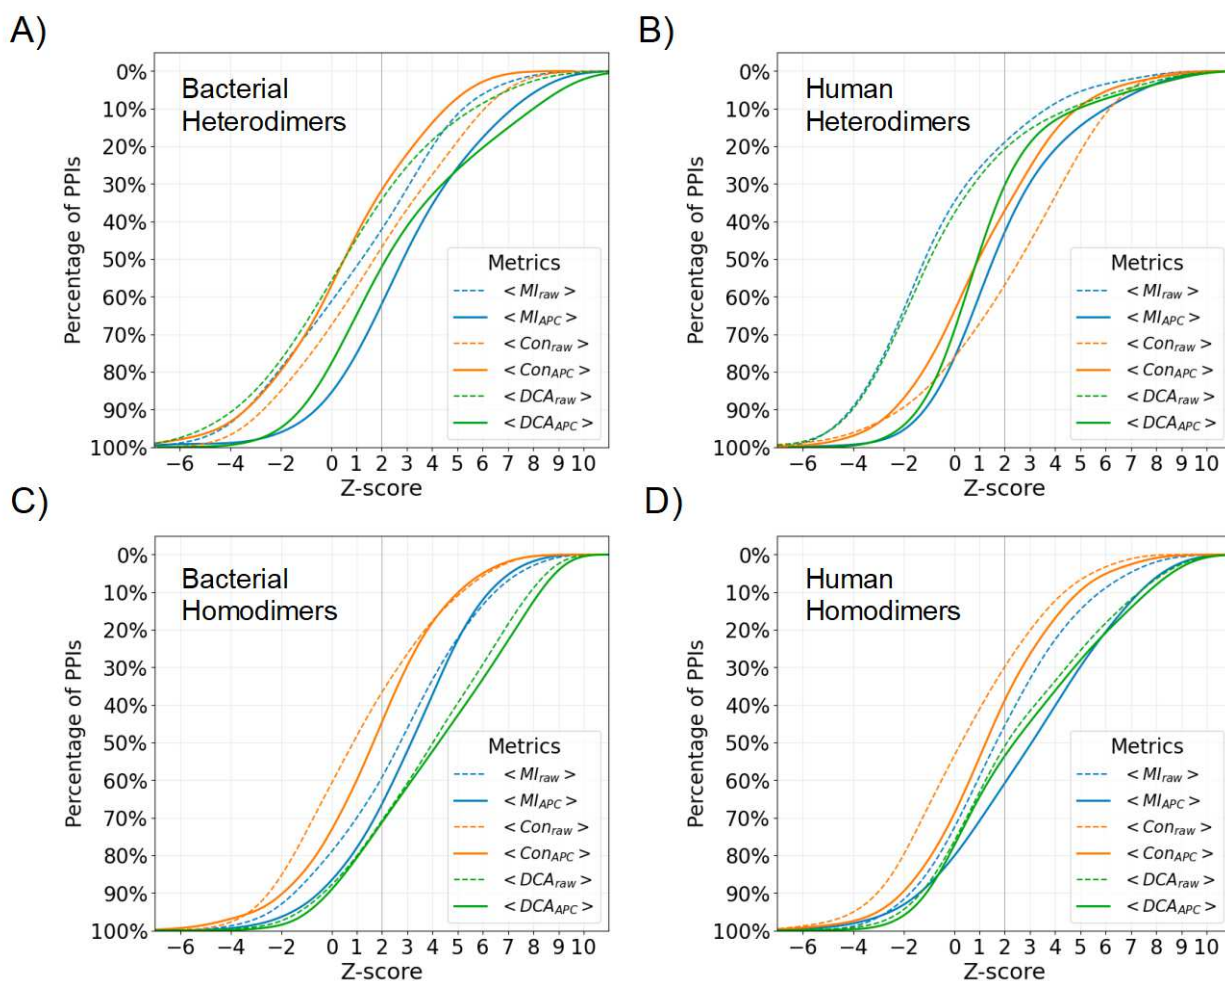

**SI Figure S1. Percentage of PDB PPIs as a function of Z-score for raw and APC-corrected metrics averaged over interface contacts.** Colors and line type defined in the legend indicate curves for different metrics

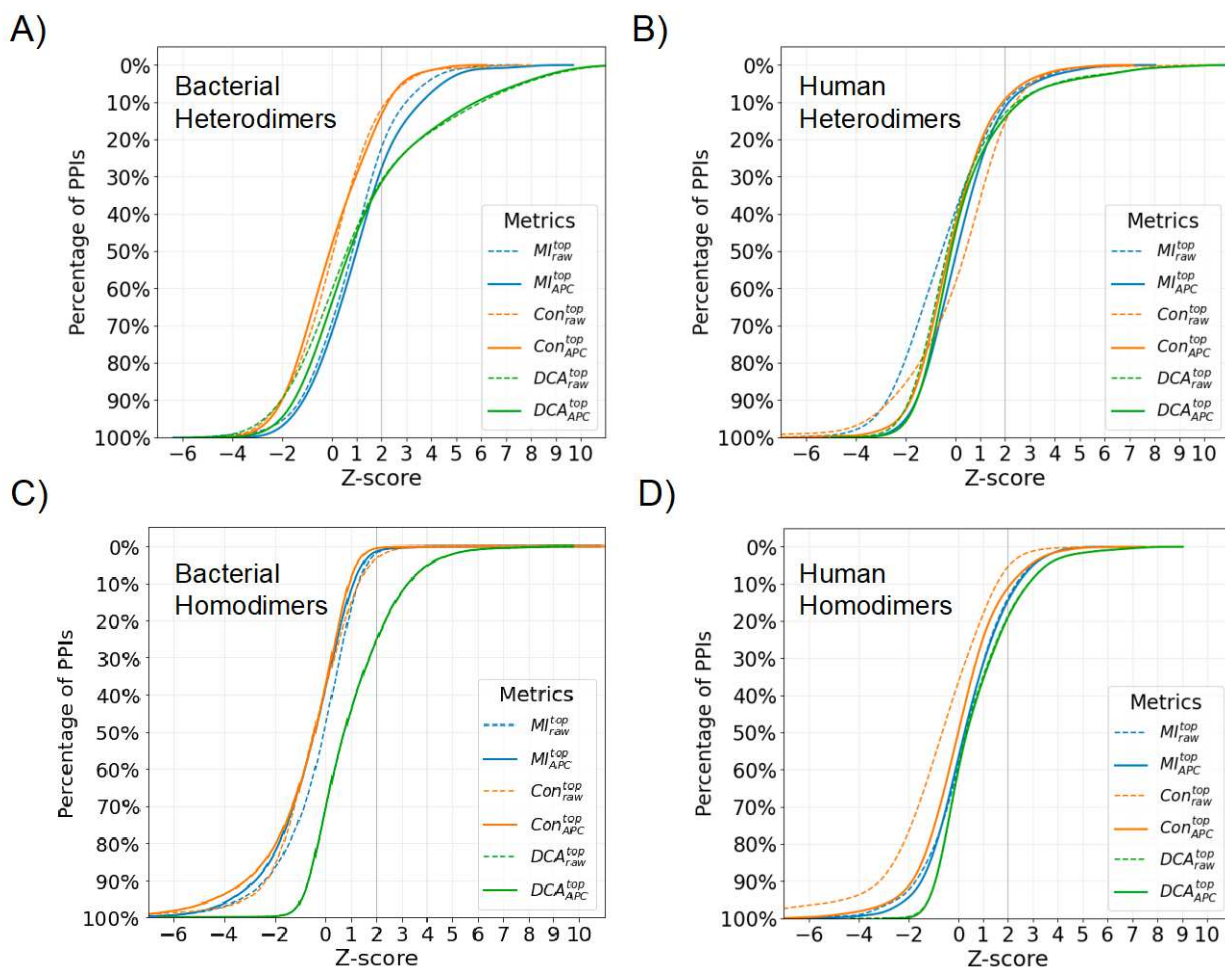

**SI Figure S2. Percentage of PDB PPIs as a function of Z-score for the interface contact with the top value for a given metric. Colors and line type defined in the legend indicate curves for different metrics.**

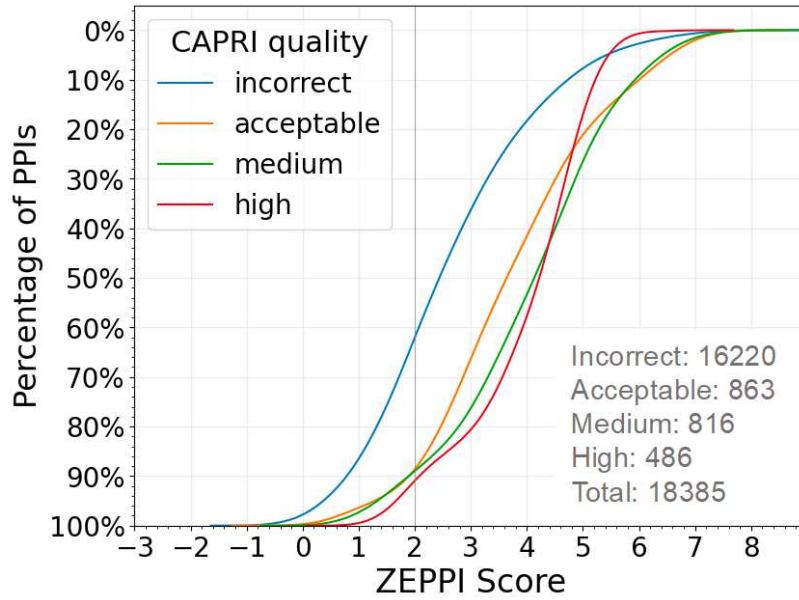

**SI Figure S3. Percentage of CAPRI structures and decoys having a given ZEPPI score.** Percentages are plotted along the y-axis for four classes of CAPRI models defined in the legend. The total number of models in each class is indicated in the text at the lower left.

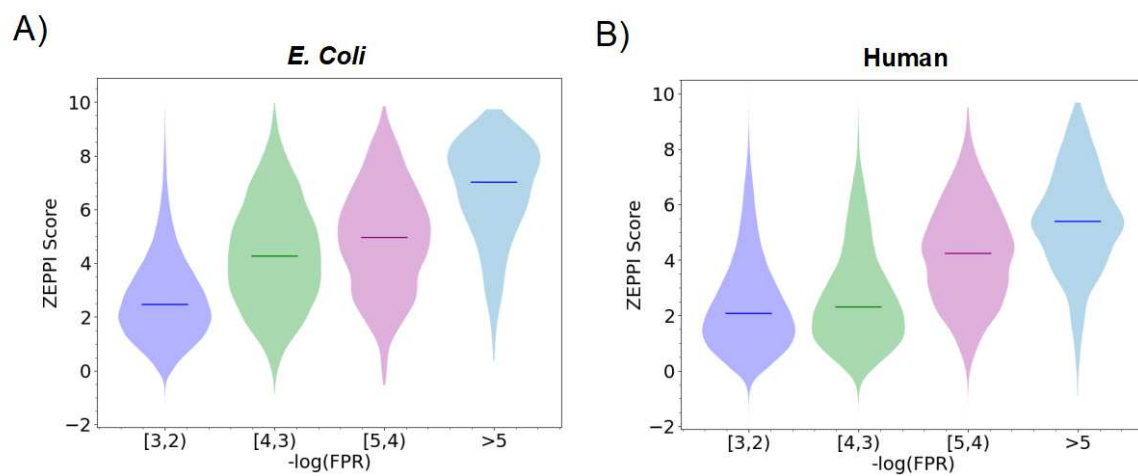

**SI Figure S4. Relationship between the ZEPPI score and FPR of PrePPI-predicted PPIs .** FPR ranges are indicated below each set of color-coded violin charts, where the median ZEPPI scores are shown as a bar.

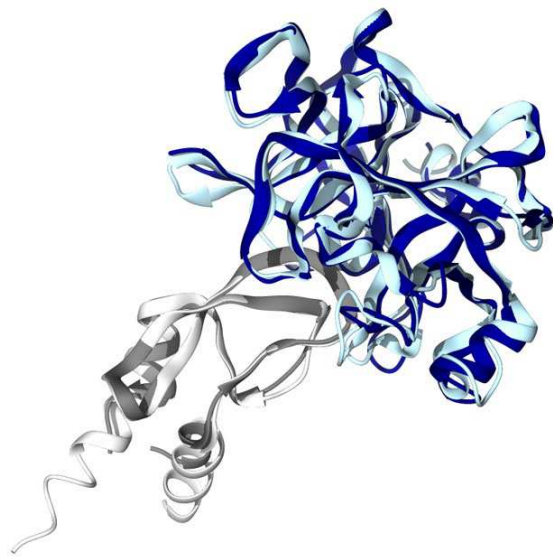

APP (Amyloid-beta precursor protein)

CELA1 (Chymotrypsin-like elastase family member 1)

PDB template: **4bnr**

Trypsin inhibitor (*Bos Taurus*)/Trypsin (*Astacus leptodactylus*)

**SI Figure S5. Interaction model for Amyloid-beta precursor protein, APP(294-341) (light gray), and Chymotrypsin-like elastase family member 1, CELA1(19-258) (light blue).** The template for modeling (PDB ID: 4bnr) is a complex of Trypsin inhibitor from *Bos Taurus* (dark gray) and Trypsin from *Astacus leptodactylus* (dark blue). PrePPI FPR < 0.0001, and ZEPPI score = 5.1. The pairwise sequence identities between queries and template chains are 26% and 33%, respectively.

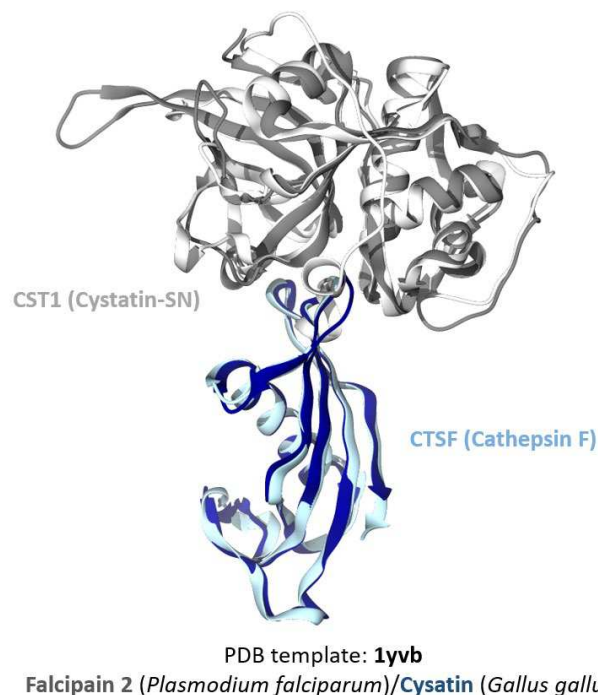

**SI Figure S6. Interaction model for Cystatin-SN, CST1(35-141) (light gray), and Cathepsin F, CTSF(244-484) (light blue).** The template for modeling (PDB ID: 1yvb) is a complex of Falcipain 2 from *Plasmodium falciparum* (dark gray) and Cystatin from *Gallus gallus* (dark blue). PrePPI FPR < 0.005, and ZEPPI score = 5.9. The pairwise sequence identities between queries and template chains are 19% and 32%, respectively.

**SI Table S1. Properties and ZEPPI performance of each CAPRI target.**

| ID       | $N_{MSA}$ | $\langle N_{IFR} \rangle$ | $N_{\geq accpt.}$ | $N_{incorrect}$ | AUROC (ZEPPI) |
|----------|-----------|---------------------------|-------------------|-----------------|---------------|
| Target29 | 623       | 64                        | 167               | 1916            | 0.926         |
| Target30 | 155       | 42                        | 2                 | 1341            | 0.550         |
| Target32 | 62        | 70                        | 15                | 584             | 0.687         |
| Target35 | 161       | 65                        | 3                 | 496             | 0.528         |
| Target37 | 142       | 48                        | 99                | 1401            | 0.542         |
| Target39 | 267       | 58                        | 4                 | 1396            | 0.843         |
| Target40 | 55        | 61                        | 588               | 1592            | 0.664         |
| Target41 | 27        | 50                        | 371               | 829             | 0.755         |
| Target46 | 1396      | 56                        | 24                | 1675            | 0.651         |
| Target47 | 24        | 53                        | 611               | 440             | 0.930         |
| Target50 | 88        | 3                         | 133               | 1318            | 0.734         |
| Target53 | 2112      | 55                        | 130               | 1270            | 0.742         |
| Target54 | 198       | 49                        | 19                | 1381            | 0.763         |

## Supplementary Files

This is a list of supplementary files associated with this preprint. Click to download.

- [flatHonigepc.pdf](#)
- [flatHonigrs.pdf](#)
